# Supplementary material for: Predictive Modeling of Pneumonia-Related Mortality in Long-Term Immunosuppressive Therapy Patients: A Machine Learning Approach with Interpretability
Source: Research Square preprint supplement (doi:10.21203/rs.3.rs-3963577/v1), 2024-03-13
Supplement: Supplementary file 1 [file b355050c6a5c79743c8fbf0b.xlsx]

## Sheet: Sheet2
Model	Cox	Random Survival Forest	Survival Support Vector Machine	P value
C index	0.721 (0.717, 0.724)	0.754 (0.750, 0.758)	0.748 (0.744, 0.752)	＜0.001
Accuracy	0.657 (0.650, 0.664)	0.659 (0.651, 0.666)	0.658 (0.651, 0.666)	0.955
F1 Score	0.553 (0.540, 0.565)	0.552 (0.538, 0.565)	0.554 (0.542, 0.566)	0.59
Recall	0.783 (0.771, 0.794)	0.790 (0.779, 0.802)	0.783 (0.770, 0.796)	0.949
Time-dependent AUC	0.751 (0.741, 0.762)	0.795 (0.787, 0.804)	0.778 (0.769, 0.788)	＜0.001
