# Supplementary material for: Predictive Modeling of Pneumonia-Related Mortality in Long-Term Immunosuppressive Therapy Patients: A Machine Learning Approach with Interpretability
Source: Research Square preprint supplement (doi:10.21203/rs.3.rs-3963577/v1), 2024-03-13
Supplement: Supplementary file 2 [file e6d13f6cb3a1c0ef763a8fac.xlsx]

## Sheet: Sheet1
		90-Days Survival	90-Days Non-Survival	Statistics	P value
Number		530(74.02%)	186(25.97%)
Gender	Female	270(50.94%)	105(56.45%)	1.461	0.227
	Male	260(49.06%)	81(43.55%)
Fever	No	163(30.75%)	19(10.22%)	29.565	＜0.001
	Yes	367(69.25%)	167(89.78%)
MAXTemperature		38.382(38.286,38.478)	38.579(38.455,38.703)	-2.307	0.021
Cough	No	73(13.77%)	15(8.06%)	3.65	0.056
	Yes	457(86.23%)	171(91.94%)
Expectoration	No	102(19.25%)	33(17.84%)	0.097	0.755
	Yes	428(80.75%)	152(82.16%)
Chest pain	No	509(96.04%)	182(97.85%)	0.857	0.354
	Yes	21(3.96%)	4(2.15%)
Dyspnea	No	251(47.36%)	34(18.28%)	47.383	＜0.001
	Yes	279(52.64%)	152(81.72%)
Antibiotics	No	174(32.83%)	40(21.51%)	7.895	0.005
	Yes	356(67.17%)	146(78.49%)
AntiviralDrugs	No	462(87.17%)	141(75.81%)	12.535	＜0.001
	Yes	68(12.83%)	45(24.19%)
Immunomodulators	No	35(6.6%)	8(4.3%)	0.918	0.338
	Yes	495(93.4%)	178(95.7%)
Asthma	No	514(96.98%)	184(98.92%)	1.403	0.236
	Yes	16(3.02%)	2(1.08%)
COPD	No	436(82.26%)	168(90.32%)	6.179	0.013
	Yes	94(17.74%)	18(9.68%)
Bronchiectasia	No	507(95.66%)	185(99.46%)	5.026	0.025
	Yes	23(4.34%)	1(0.54%)
Interstitial Lung Disease	No	307(57.92%)	85(45.7%)	7.82	0.005
	Yes	223(42.08%)	101(54.3%)
Hypertension	No	353(66.6%)	117(62.9%)	0.68	0.41
	Yes	177(33.4%)	69(37.1%)
Coronary Heart Disease	No	468(88.3%)	161(86.56%)	0.245	0.62
	Yes	62(11.7%)	25(13.44%)
Congestive Heart Failure	No	519(97.92%)	177(95.16%)	2.921	0.087
	Yes	11(2.08%)	9(4.84%)
Diabetes Mellitus	No	405(76.42%)	132(70.97%)	1.898	0.168
	Yes	125(23.58%)	54(29.03%)
Nephrotic syndrome	No	465(87.74%)	161(86.56%)	0.083	0.773
	Yes	65(12.26%)	25(13.44%)
Liver Cirrhosis	No	524(98.87%)	185(99.46%)	0.076	0.783
	Yes	6(1.13%)	1(0.54%)
Connective Tissue Disease	No	265(50.0%)	83(44.62%)	1.385	0.239
	Yes	265(50.0%)	103(55.38%)
Solid Organ Transplantation	No	476(89.81%)	177(95.16%)	4.267	0.039
	Yes	54(10.19%)	9(4.84%)
Idiopathic Interstitial Pneumonias	No	477(90.0%)	166(89.25%)	0.023	0.88
	Yes	53(10.0%)	20(10.75%)
Tumor	No	501(94.53%)	172(92.47%)	0.698	0.403
	Yes	29(5.47%)	14(7.53%)
Cerebrovascular Diseases	No	488(92.08%)	178(95.7%)	2.253	0.133
	Yes	42(7.92%)	8(4.3%)
Smoke	No	398(75.09%)	129(69.35%)	6.859	0.032
	Yes	117(22.08%)	44(23.66%)
	2	15(2.83%)	13(6.99%)
Alcoholism	No	490(92.45%)	169(90.86%)	0.284	0.594
	Yes	40(7.55%)	17(9.14%)
Bronchoscope time		3.556(2.819,4.293)	5.166(3.889,6.443)	-2.275	0.025
Time of antibiotics		8.006(6.322,9.69)	6.395(4.602,8.189)	1.172	0.243
Disturbance of consciousness	No	512(96.6%)	164(88.17%)	16.994	＜0.001
	Yes	18(3.4%)	22(11.83%)
Cyanosis	No	462(87.5%)	103(55.68%)	82.43	＜0.001
	Yes	66(12.5%)	82(44.32%)
Moistrales	No	213(40.19%)	40(21.51%)	20.224	＜0.001
	Yes	317(59.81%)	146(78.49%)
Wheezing Sound	No	468(88.8%)	162(87.57%)	0.102	0.749
	Yes	59(11.2%)	23(12.43%)
Oxygen inhalation	No	184(34.78%)	15(8.11%)	47.195	＜0.001
	Yes	345(65.22%)	170(91.89%)
Invasive Ventilation	No	476(89.81%)	68(36.56%)	211.011	＜0.001
	Yes	54(10.19%)	118(63.44%)
Noninvasive Ventilation	No	461(86.98%)	82(44.09%)	135.921	＜0.001
	Yes	69(13.02%)	104(55.91%)
Ventilation	No	428(80.75%)	30(16.13%)	246.679	＜0.001
	Yes	102(19.25%)	156(83.87%)
FIO2		0.333(0.317,0.35)	0.616(0.58,0.653)	-15.679	＜0.001
SPo2		95.145(94.729,95.56)	93.4(92.747,94.052)	4.562	＜0.001
PH		7.444(7.439,7.449)	7.429(7.419,7.44)	2.86	0.004
PCO2		35.699(35.052,36.346)	36.233(35.051,37.415)	-0.835	0.404
PO2		81.832(79.562,84.101)	75.406(71.718,79.095)	2.991	0.003
LAC		0.512(0.455,0.569)	1.031(0.985,1.076)	-10.229	＜0.001
Oxygenation index		290.814(277.838,303.791)	153.277(139.405,167.15)	12.53	＜0.001
White Blood Cell count		8.519(8.158,8.879)	10.261(9.557,10.964)	-4.626	＜0.001
Neutrophil count		6.834(6.492,7.175)	9.143(8.469,9.817)	-6.451	＜0.001
Lymphocyte Count		1.107(1.048,1.165)	0.788(0.696,0.879)	5.552	＜0.001
Hemoglobin		113.368(111.374,115.363)	108.267(105.044,111.49)	2.58	0.01
Hematocrit		34.072(33.468,34.675)	31.493(30.413,32.573)	4.122	＜0.001
Platelet		198.831(191.231,206.431)	164.322(151.377,177.266)	4.505	＜0.001
Albumin		33.617(33.1,34.135)	30.162(29.288,31.036)	6.652	＜0.001
Lactate Dehydrogenase		343.915(324.923,362.908)	507.454(470.146,544.763)	-8.326	＜0.001
Aspartate Aminotransferase		27.614(26.054,29.173)	40.65(37.538,43.762)	-7.941	＜0.001
Alanine Aminotransferase		31.804(29.667,33.941)	37.897(34.198,41.597)	-2.83	0.005
Alkaline Phosphatase		73.132(70.093,76.171)	90.209(83.824,96.594)	-5.132	＜0.001
Total Bilirubin		10.586(10.048,11.124)	12.743(11.6,13.887)	-3.706	＜0.001
Direct Bilirubin		3.677(3.47,3.884)	4.965(4.529,5.401)	-5.765	＜0.001
Creatine Kinase		44.462(41.211,47.713)	52.525(46.897,58.153)	-2.502	0.013
Blood Urea Nitrogen		7.162(6.812,7.513)	9.611(8.923,10.298)	-6.673	＜0.001
Creatinine		73.093(70.179,76.007)	81.712(75.915,87.509)	-2.813	0.005
Glucose		6.346(6.082,6.61)	7.944(7.44,8.448)	-5.771	＜0.001
Potassium		3.875(3.832,3.917)	4.014(3.932,4.096)	-3.146	0.002
Sodium		137.95(137.576,138.324)	135.943(135.127,136.759)	4.944	＜0.001
Erythrocyte Sedimentation Rate		43.985(40.685,47.286)	52.91(46.651,59.169)	-2.493	0.013
C-Reactive Protein		7.09[1.59,25.1]	11.0[2.9,36.5]	10962.5	0.037
Procalcitonin		0.26[0.12,0.6075]	0.39[0.125,1.525]	23467.5	0.002
D-dimmer		2.71[0.805,35.75]	3.005[1.69,11.7425]	17455.5	0.608
Prothrombin Time		14.873(14.508,15.237)	14.671(14.11,15.232)	0.572	0.568
Activated Partial Thromboplastin Time		31.871(30.736,33.006)	35.556(33.456,37.657)	-3.194	0.001
International Normalized Ratio		1.242(1.204,1.28)	1.223(1.167,1.279)	0.517	0.605
Persistent lymphocytopenia	No	346(65.28%)	66(35.48%)	48.83	＜0.001
	Yes	184(34.72%)	120(64.52%)
Pleural effusion	No	428(86.64%)	124(77.5%)	6.991	0.008
	Yes	66(13.36%)	36(22.5%)
Multilobular infiltration	No	25(6.94%)	1(0.75%)	6.332	0.012
	Yes	335(93.06%)	133(99.25%)
Ground-Glass Opacity	No	177(39.16%)	38(24.84%)	9.62	0.002
	Yes	275(60.84%)	115(75.16%)
Patchy	No	139(44.41%)	47(39.17%)	0.771	0.38
	Yes	174(55.59%)	73(60.83%)
Consolidation	No	258(57.08%)	60(39.47%)	13.446	＜0.001
	Yes	194(42.92%)	92(60.53%)
Atelectasis	No	346(97.74%)	127(96.95%)	0.029	0.865
	Yes	8(2.26%)	4(3.05%)
Cavity	No	420(92.72%)	137(91.33%)	0.141	0.708
	Yes	33(7.28%)	13(8.67%)
Honeycombing	No	267(59.07%)	75(49.02%)	4.299	0.038
	Yes	185(40.93%)	78(50.98%)
Bronchoscope	No	225(42.45%)	48(25.81%)	15.474	＜0.001
	Yes	305(57.55%)	138(74.19%)
Curb65		0.926(0.852,1.001)	1.538(1.396,1.679)	-7.928	＜0.001
Pneumonia Severity Index		75.421(72.98,77.863)	97.661(93.243,102.08)	-8.916	＜0.001
APACHE11		11.931(11.216,12.647)	16.127(14.647,17.606)	-5.601	＜0.001
Intubation	No	391(88.66%)	57(34.97%)	176.307	＜0.001
	Yes	50(11.34%)	106(65.03%)
Icu Stay	No	394(74.34%)	30(16.13%)	190.775	＜0.001
	Yes	136(25.66%)	156(83.87%)
ECMO(Extracorporeal Membrane Oxygenation)	No	514(96.98%)	166(89.25%)	15.664	＜0.001
	Yes	16(3.02%)	20(10.75%)
Vasoactive Drugs	No	509(96.04%)	84(45.41%)	244.86	＜0.001
	Yes	21(3.96%)	101(54.59%)
Continuous Venovenous Hemofiltration(CVVH)	No	514(96.98%)	136(73.12%)	90.859	＜0.001
	Yes	16(3.02%)	50(26.88%)
Cytomegalovirus	No	379(71.51%)	117(62.9%)	4.395	0.036
	Yes	151(28.49%)	69(37.1%)
PCP	No	436(82.26%)	131(70.43%)	10.993	0.001
	Yes	94(17.74%)	55(29.57%)
Aspergillus	No	471(88.87%)	151(81.18%)	6.472	0.011
	Yes	59(11.13%)	35(18.82%)
Galactomannan assay in blood		0.262(0.224,0.3)	0.293(0.235,0.35)	-0.91	0.364
Galactomannan assay in Bronchoalveolar Lavage Fluid		0.175[0.0,1.1575]	0.275[0.0,1.419]	10082.5	0.454
Glucocorticoid accumulation		6.968(6.389,7.546)	4.821(4.039,5.602)	3.916	＜0.001
Infeciton time(month)		5.0[2.0,24.0]	3.0[1.0,9.0]	48898.5	＜0.001
High dose glucocorticoid	No	374(70.57%)	93(50.0%)	24.775	＜0.001
	Yes	156(29.43%)	93(50.0%)
Immuno-suppressant	No	309(58.3%)	110(59.14%)	0.013	0.91
	Yes	221(41.7%)	76(40.86%)
Ganciclovir	No	315(59.43%)	65(34.95%)	32.173	＜0.001
	Yes	215(40.57%)	121(65.05%)
Sulfanilamide	No	311(58.68%)	72(38.71%)	21.274	＜0.001
	Yes	219(41.32%)	114(61.29%)
Anti-aspergillus	No	369(69.62%)	65(34.95%)	67.903	＜0.001
	Yes	161(30.38%)	121(65.05%)
